# Supplementary material
Source: PubMed Central journal article supplement (PMC5484750)
Supplement: NIHMS841001-supplement-3.pdf [file NIHMS841001-supplement-3.pdf]

| <b>A549 +LKB1</b>                                     | <b>Flux</b>          | <b>95% confidence interval</b> |                    |
|-------------------------------------------------------|----------------------|--------------------------------|--------------------|
| <b>Pathway/Reaction</b>                               | <b>(pmol/μg/min)</b> | <b>Lower bound</b>             | <b>Upper bound</b> |
| <b>Glycolysis</b>                                     |                      |                                |                    |
| Glc.x -> Glc                                          | 41.54                | 41.04                          | 42.04              |
| Glc -> G6P                                            | 41.54                | 41.04                          | 42.04              |
| G6P <-> F6P                                           | 17.42                | 9.423                          | 25.41              |
| G6P <-> F6P                                           | 60                   | 0                              | Inf                |
| F6P -> DHAP + GAP                                     | 33.5                 | 30.92                          | 37.18              |
| DHAP <-> GAP                                          | 33.5                 | 30.92                          | 37.18              |
| DHAP <-> GAP                                          | 0.006575             | 0                              | Inf                |
| GAP <-> 3PG                                           | 75.04                | 72.5                           | 78.67              |
| GAP <-> 3PG                                           | 0.1421               | 0                              | Inf                |
| 3PG -> Ser                                            | 4.48E-05             | 2.24E-05                       | 0.2016             |
| Ser <-> Gly + MEETHF                                  | -1.11E-16            | -1.11E-16                      | -1.11E-16          |
| Ser <-> Gly + MEETHF                                  | 0.4307               | 0                              | Inf                |
| 3PG -> Pyr.c                                          | 75.04                | 72.47                          | 78.67              |
| Pyr.c <-> Lac                                         | 68.89                | 66.48                          | 71.42              |
| Pyr.c <-> Lac                                         | 1.00E-07             | 0                              | Inf                |
| Lac -> Lac.x                                          | 68.89                | 66.48                          | 71.42              |
| Pyr.c <-> Ala.c                                       | 6.00E-05             | 3.00E-05                       | 0.2701             |
| Pyr.c <-> Ala.c                                       | 0.2339               | 0                              | Inf                |
| Pyr.c -> Pyr.x                                        | 5.3                  | 5.3                            | 5.3                |
| <b>Pentose Phosphate Pathway</b>                      |                      |                                |                    |
| G6P -> P5P + CO2                                      | 24.12                | 15.96                          | 32.42              |
| P5P + P5P <-> S7P + GAP                               | 8.042                | 4.15                           | 10.87              |
| P5P + P5P <-> S7P + GAP                               | 1.01E-07             | 0                              | Inf                |
| S7P + GAP <-> F6P + E4P                               | 8.042                | 4.15                           | 10.87              |
| S7P + GAP <-> F6P + E4P                               | 0.007718             | 0                              | Inf                |
| P5P + E4P <-> F6P + GAP                               | 8.042                | 4.15                           | 10.87              |
| P5P + E4P <-> F6P + GAP                               | 1.00E-07             | 0                              | Inf                |
| <b>Anaplerotic reactions</b>                          |                      |                                |                    |
| Pyr.m <-> Ala.m                                       | 1.67E-16             | 1.67E-16                       | 1.67E-16           |
| Pyr.m <-> Ala.m                                       | 0.09534              | 0                              | Inf                |
| Pyr.m + CO2 -> Oac.m                                  | 0.2248               | 0.1726                         | 0.3552             |
| Mal.m -> Pyr.m + CO2                                  | 0.09004              | 0.01478                        | 0.1904             |
| Mal.c -> Pyr.c + CO2                                  | 1.983                | 1.571                          | 2.137              |
| Pyr.m -> AcCoA.m + CO2                                | 2.696                | 2.586                          | 2.962              |
| Gln <-> Glu                                           | 3.807                | 3.643                          | 3.917              |
| Gln <-> Glu                                           | 0.02998              | 0                              | 0.2717             |
| Glu <-> Akg                                           | 1.848                | 1.579                          | 1.961              |
| Glu <-> Akg                                           | 7.57E+04             | 72.69                          | Inf                |
| Pyr.c -> Pyr.m                                        | 2.83                 | 2.71                           | 2.955              |
| Gln.x -> Gln                                          | 3.807                | 3.697                          | 3.968              |
| Glu -> Glu.x                                          | 1.959                | 1.931                          | 1.987              |
| <b>TCA Cycle</b>                                      |                      |                                |                    |
| AcCoA.m + Oac.m -> Cit                                | 2.86                 | 2.745                          | 3.009              |
| Cit <-> Akg + CO2                                     | 2.818                | 2.653                          | 3.117              |
| Cit <-> Akg + CO2                                     | 0.3076               | 0.2181                         | 0.4354             |
| Akg -> Suc + CO2                                      | 4.666                | 4.201                          | 4.895              |
| Suc <-> Fum.m                                         | 4.666                | 4.201                          | 4.895              |
| Suc <-> Fum.m                                         | 1.00E-07             | 0                              | Inf                |
| Fum.m <-> Mal.m                                       | 4.666                | 4.201                          | 4.895              |
| Fum.m <-> Mal.m                                       | 1259                 | 3.298                          | Inf                |
| Mal.m <-> Oac.m                                       | 2.635                | 2.408                          | 2.801              |
| Mal.m <-> Oac.m                                       | 18.77                | 4.486                          | Inf                |
| Oac.m <-> Asp.m                                       | -1.07E-06            | -0.2414                        | 0.01772            |
| Oac.m <-> Asp.m                                       | 1.00E-07             | 0                              | Inf                |
| <b>Biomass and Fatty acid synthesis and oxidation</b> |                      |                                |                    |
| Cit -> AcCoA.c + Oac.c                                | 0.04174              | 0.02493                        | 0.1889             |
| AcCoA.c + AcCoA.c + AcCoA.c + AcCoA.c + AcCoA.c       | 0.005213             | 0.001789                       | 0.007397           |
| + AcCoA.c + AcCoA.c + AcCoA.c -> Palm.s               |                      |                                |                    |
| Palm.d -> Palm.s                                      | 0.007735             | 0.002931                       | 0.01265            |
| Palm.x -> Palm.s                                      | 0.007566             | 0.003597                       | 0.01046            |

| A549 +LKB1<br>Pathway/Reaction                                                                                        | Flux<br>(pmol/μg/min) | 95% confidence interval |             |
|-----------------------------------------------------------------------------------------------------------------------|-----------------------|-------------------------|-------------|
|                                                                                                                       |                       | Lower bound             | Upper bound |
| <b>Biomass and Fatty acid synthesis and oxidation (cont.)</b>                                                         |                       |                         |             |
| Palm.s -> AcCoA.m + AcCoA.m + AcCoA.m +<br>AcCoA.m + AcCoA.m + AcCoA.m + AcCoA.m +<br>AcCoA.m                         | 0.02051               | 0.01462                 | 0.02844     |
| 0*Palm.s -> Palm.mnt                                                                                                  | 0.02283               | 0                       | Inf         |
| 0*Palm.s -> Palm.isa                                                                                                  | 0.6926                | 0.6333                  | 0.7518      |
| 0*Palm.x -> Palm.isa                                                                                                  | 0.3074                | 0                       | 0.3667      |
| 0*Palm.d -> Palm.isa                                                                                                  | 1.00E-07              | 0                       | 0.3667      |
| Palm.isa -> Palm.fix                                                                                                  | 1                     | 1                       | 1           |
| 113*Asp.c + 386*Glu + 600*Ala.c + 448*Ser +<br>658*Gly + 322*Gln + 0.133*Palm.s + 324*AcCoA.c<br>+ 233*P5P -> Biomass | 1.00E-07              | 5.00E-08                | 4.50E-04    |
| <b>Cytosolic</b>                                                                                                      |                       |                         |             |
| Oac.c <-> Mal.c                                                                                                       | 0.03527               | -0.4643                 | 0.07229     |
| Oac.c <-> Mal.c                                                                                                       | 1.00E-07              | 0                       | 0.02172     |
| Oac.c <-> Asp.c                                                                                                       | 0.006466              | -0.01224                | 0.1888      |
| Oac.c <-> Asp.c                                                                                                       | 0.2495                | 0                       | Inf         |
| Asp.c -> Fum.c                                                                                                        | 0.006453              | 6.20E-05                | 0.1382      |
| Mal.c <-> Fum.c                                                                                                       | -0.006453             | -0.1382                 | -6.20E-05   |
| Mal.c <-> Fum.c                                                                                                       | 1.00E-07              | 0                       | 0.02184     |
| Mal.c <-> Mal.m                                                                                                       | -1.941                | -2.193                  | -0.7952     |
| Mal.c <-> Mal.m                                                                                                       | 1.00E-07              | 0                       | Inf         |
| Asp.m <-> Asp.c                                                                                                       | -1.07E-06             | -0.2414                 | 0.01772     |
| Asp.m <-> Asp.c                                                                                                       | 1.00E-07              | 0                       | Inf         |
| <b>Dilution/Mixing</b>                                                                                                |                       |                         |             |
| Gly.d -> Gly                                                                                                          | 6.58E-05              | 3.29E-05                | 0.2962      |
| 0*Pyr.c -> Pyr.mnt                                                                                                    | 1.00E-07              | 5.00E-08                | 0.8657      |
| 0*Pyr.m -> Pyr.mnt                                                                                                    | 1                     | 0.1343                  | 1           |
| 0*Mal.c -> Mal.mnt                                                                                                    | 0.9999                | 5.00E-08                | 1           |
| 0*Mal.m -> Mal.mnt                                                                                                    | 9.62E-05              | 0                       | 1           |
| 0*Asp.c -> Asp.mnt                                                                                                    | 1                     | 0.004741                | 1           |
| 0*Asp.m -> Asp.mnt                                                                                                    | 1.66E-07              | 0                       | 0.9953      |
| 0*Fum.m -> Fum.mnt                                                                                                    | 1.00E-07              | 5.00E-08                | 0.3173      |
| 0*Fum.c -> Fum.mnt                                                                                                    | 1                     | 0.6827                  | 1           |
| Suc.d -> Suc.mnt                                                                                                      | 1.00E-07              | 5.00E-08                | 0.06792     |
| 0*Suc -> Suc.mnt                                                                                                      | 1                     | 0.9321                  | 1           |
| 0*Ala.c -> Ala.mnt                                                                                                    | 0.01778               | 0                       | Inf         |
| 0*Ala.m -> Ala.mnt                                                                                                    | 0.02304               | 0                       | Inf         |
| SSE:                                                                                                                  | 55.30                 | 53.00                   | - 142.00    |
