# Supplementary material
Source: PubMed Central journal article supplement (PMC5484750)
Supplement: NIHMS841001-supplement-4.pdf [file NIHMS841001-supplement-4.pdf]

| <b>A549 vec.</b><br><b>Pathway/Reaction</b>                                                | <b>Flux</b><br><b>(pmol/μg/min)</b> | <b>95% confidence interval</b> |                    |
|--------------------------------------------------------------------------------------------|-------------------------------------|--------------------------------|--------------------|
|                                                                                            |                                     | <b>Lower bound</b>             | <b>Upper bound</b> |
| <b>Glycolysis</b>                                                                          |                                     |                                |                    |
| Glc.x -> Glc                                                                               | 40.45                               | 39.99                          | 40.91              |
| Glc -> G6P                                                                                 | 40.45                               | 39.99                          | 40.91              |
| G6P <-> F6P                                                                                | 26.46                               | 13.56                          | 39.79              |
| G6P <-> F6P                                                                                | 1.00E-07                            | 0                              | Inf                |
| F6P -> DHAP + GAP                                                                          | 35.7                                | 31.92                          | 37.66              |
| DHAP <-> GAP                                                                               | 35.7                                | 31.92                          | 37.66              |
| DHAP <-> GAP                                                                               | 1.00E-07                            | 0                              | Inf                |
| GAP <-> 3PG                                                                                | 76.03                               | 71.81                          | 80.07              |
| GAP <-> 3PG                                                                                | 10.76                               | 0                              | Inf                |
| 3PG -> Ser                                                                                 | 0.2432                              | 0.2316                         | 0.2643             |
| Ser <-> Gly + MEETHF                                                                       | -1.11E-16                           | -1.11E-16                      | -1.11E-16          |
| Ser <-> Gly + MEETHF                                                                       | 0.3308                              | 0                              | Inf                |
| 3PG -> Pyr.c                                                                               | 75.78                               | 70.27                          | 79.6               |
| Pyr.c <-> Lac                                                                              | 68.44                               | 64.31                          | 71.81              |
| Pyr.c <-> Lac                                                                              | 1.61                                | 0                              | Inf                |
| Lac -> Lac.x                                                                               | 68.44                               | 64.31                          | 71.81              |
| Pyr.c <-> Ala.c                                                                            | 0.3257                              | 0.3102                         | 0.354              |
| Pyr.c <-> Ala.c                                                                            | 9.74E-05                            | 0                              | Inf                |
| Pyr.c -> Pyr.x                                                                             | 6.34                                | 5.688                          | 6.997              |
| <b>Pentose Phosphate Pathway</b>                                                           |                                     |                                |                    |
| G6P -> P5P + CO2                                                                           | 13.99                               | 1.403                          | 26.09              |
| P5P + P5P <-> S7P + GAP                                                                    | 4.622                               | 0.4215                         | 8.568              |
| P5P + P5P <-> S7P + GAP                                                                    | 1.00E-07                            | 0                              | Inf                |
| S7P + GAP <-> F6P + E4P                                                                    | 4.622                               | 0.4215                         | 8.568              |
| S7P + GAP <-> F6P + E4P                                                                    | 1.00E-07                            | 0                              | Inf                |
| P5P + E4P <-> F6P + GAP                                                                    | 4.622                               | 0.4215                         | 8.568              |
| P5P + E4P <-> F6P + GAP                                                                    | 37.91                               | 0                              | Inf                |
| <b>Anaplerotic reactions</b>                                                               |                                     |                                |                    |
| Pyr.m <-> Ala.m                                                                            | 1.67E-16                            | 1.67E-16                       | 1.67E-16           |
| Pyr.m <-> Ala.m                                                                            | 0.1312                              | 0                              | Inf                |
| Pyr.m + CO2 -> Oac.m                                                                       | 0.237                               | 0.1821                         | 0.2814             |
| Mal.m -> Pyr.m + CO2                                                                       | 0.08862                             | 0.0241                         | 0.2148             |
| Mal.c -> Pyr.c + CO2                                                                       | 1.006                               | 0.512                          | 1.269              |
| Pyr.m -> AcCoA.m + CO2                                                                     | 1.531                               | 1.389                          | 1.729              |
| Gln <-> Glu                                                                                | 3.23                                | 2.912                          | 3.438              |
| Gln <-> Glu                                                                                | 1.00E-07                            | 0                              | > 0.4144           |
| Glu <-> Akg                                                                                | 0.9186                              | 0.5037                         | 1.144              |
| Glu <-> Akg                                                                                | 1.00E+07                            | 93.4                           | Inf                |
| Pyr.c -> Pyr.m                                                                             | 1.68                                | 1.5                            | 1.986              |
| Gln.x -> Gln                                                                               | 3.405                               | 3.088                          | 3.609              |
| Glu -> Glu.x                                                                               | 2.102                               | 2.005                          | 2.199              |
| <b>TCA Cycle</b>                                                                           |                                     |                                |                    |
| AcCoA.m + Oac.m -> Cit                                                                     | 1.767                               | 1.646                          | 2.024              |
| Cit <-> Akg + CO2                                                                          | 1.544                               | 1.385                          | 1.79               |
| Cit <-> Akg + CO2                                                                          | 0.1127                              | < 0.00104                      | 0.1888             |
| Akg -> Suc + CO2                                                                           | 2.463                               | 2.139                          | 3.116              |
| Suc <-> Fum.m                                                                              | 2.463                               | 2.139                          | 3.116              |
| Suc <-> Fum.m                                                                              | 1.00E-07                            | 0                              | 4.818              |
| Fum.m <-> Mal.m                                                                            | 2.463                               | 2.139                          | 3.116              |
| Fum.m <-> Mal.m                                                                            | 34.61                               | 0                              | Inf                |
| Mal.m <-> Oac.m                                                                            | 1.53                                | 1.358                          | 1.648              |
| Mal.m <-> Oac.m                                                                            | 25.93                               | 1.748                          | Inf                |
| Oac.m <-> Asp.m                                                                            | -3.65E-05                           | -0.6569                        | 0.08871            |
| Oac.m <-> Asp.m                                                                            | 1.00E-07                            | 0                              | Inf                |
| <b>Biomass and Fatty acid synthesis and oxidation</b>                                      |                                     |                                |                    |
| Cit -> AcCoA.c + Oac.c                                                                     | 0.2228                              | 0.1996                         | 0.258              |
| AcCoA.c + AcCoA.c + AcCoA.c + AcCoA.c + AcCoA.c<br>+ AcCoA.c + AcCoA.c + AcCoA.c -> Palm.s | 0.00586                             | 0.003471                       | 0.008739           |
| Palm.d -> Palm.s                                                                           | 0.0127                              | 0.008211                       | 0.02227            |
| Palm.x -> Palm.s                                                                           | 0.01095                             | 0.008118                       | 0.0147             |

| A549 vec.<br>Pathway/Reaction                                                                                         | Flux<br>(pmol/μg/min) | 95% confidence interval |                 |
|-----------------------------------------------------------------------------------------------------------------------|-----------------------|-------------------------|-----------------|
|                                                                                                                       |                       | Lower bound             | Upper bound     |
| <b>Biomass and Fatty acid synthesis and oxidation (cont.)</b>                                                         |                       |                         |                 |
| Palm.s -> AcCoA.m + AcCoA.m + AcCoA.m +<br>AcCoA.m + AcCoA.m + AcCoA.m + AcCoA.m +<br>AcCoA.m                         | 0.02945               | 0.02172                 | 0.04529         |
| 0*Palm.s -> Palm.mnt                                                                                                  | 0.0177                | 0                       | Inf             |
| 0*Palm.s -> Palm.isa                                                                                                  | 0.4681                | 0.4498                  | 0.4863          |
| 0*Palm.x -> Palm.isa                                                                                                  | 0.258                 | 0                       | 0.2763          |
| 0*Palm.d -> Palm.isa                                                                                                  | 0.2739                | 0                       | 0.2921          |
| Palm.isa -> Palm.fix                                                                                                  | 1                     | 1                       | 1               |
| 113*Asp.c + 386*Glu + 600*Ala.c + 448*Ser +<br>658*Gly + 322*Gln + 0.133*Palm.s + 324*AcCoA.c<br>+ 233*P5P -> Biomass | 0.0005428             | 0.000517                | 0.00059         |
| <b>Cytosolic</b>                                                                                                      |                       |                         |                 |
| Oac.c <-> Mal.c                                                                                                       | 0.1541                | -0.1872                 | 0.2506          |
| Oac.c <-> Mal.c                                                                                                       | 1.00E-07              | 0                       | Inf             |
| Oac.c <-> Asp.c                                                                                                       | 0.06869               | -0.02719                | 0.5797          |
| Oac.c <-> Asp.c                                                                                                       | 0.08526               | 0                       | Inf             |
| Asp.c -> Fum.c                                                                                                        | 0.007318              | -5.55E-17               | 0.5157          |
| Mal.c <-> Fum.c                                                                                                       | -0.007318             | -0.5157                 | 0               |
| Mal.c <-> Fum.c                                                                                                       | 1.00E-07              | 0                       | > 2.571e6       |
| Mal.c <-> Mal.m                                                                                                       | -0.8443               | -1.366                  | -0.5872         |
| Mal.c <-> Mal.m                                                                                                       | 1.00E-07              | 0                       | Inf             |
| Asp.m <-> Asp.c                                                                                                       | -3.65E-05             | -0.6569                 | 0.08871         |
| Asp.m <-> Asp.c                                                                                                       | 1.00E-07              | 0                       | Inf             |
| <b>Dilution/Mixing</b>                                                                                                |                       |                         |                 |
| Gly.d -> Gly                                                                                                          | 0.3572                | 0.3402                  | 0.3882          |
| 0*Pyr.c -> Pyr.mnt                                                                                                    | 1.00E-07              | 5.00E-08                | 0.589           |
| 0*Pyr.m -> Pyr.mnt                                                                                                    | 1                     | 0.411                   | 1               |
| 0*Mal.c -> Mal.mnt                                                                                                    | 1                     | 5.00E-08                | 1               |
| 0*Mal.m -> Mal.mnt                                                                                                    | 1.00E-07              | 0                       | 1               |
| 0*Asp.c -> Asp.mnt                                                                                                    | 1                     | 5.00E-08                | 1               |
| 0*Asp.m -> Asp.mnt                                                                                                    | 1.00E-07              | 0                       | 1               |
| 0*Fum.m -> Fum.mnt                                                                                                    | 1.00E-07              | 5.00E-08                | 0.995           |
| 0*Fum.c -> Fum.mnt                                                                                                    | 1                     | 0.004973                | 1               |
| Suc.d -> Suc.mnt                                                                                                      | 0.01559               | 5.00E-08                | 0.1032          |
| 0*Suc -> Suc.mnt                                                                                                      | 0.9844                | 0.8968                  | 1               |
| 0*Ala.c -> Ala.mnt                                                                                                    | 0.5612                | 0                       | Inf             |
| 0*Ala.m -> Ala.mnt                                                                                                    | 0.03792               | 0                       | Inf             |
| SSE:                                                                                                                  | <b>82.40</b>          | <b>44.80</b>            | <b>- 128.30</b> |
