# Supplementary material
Source: PubMed Central journal article supplement (PMC5484750)

Supplemental Figure 1

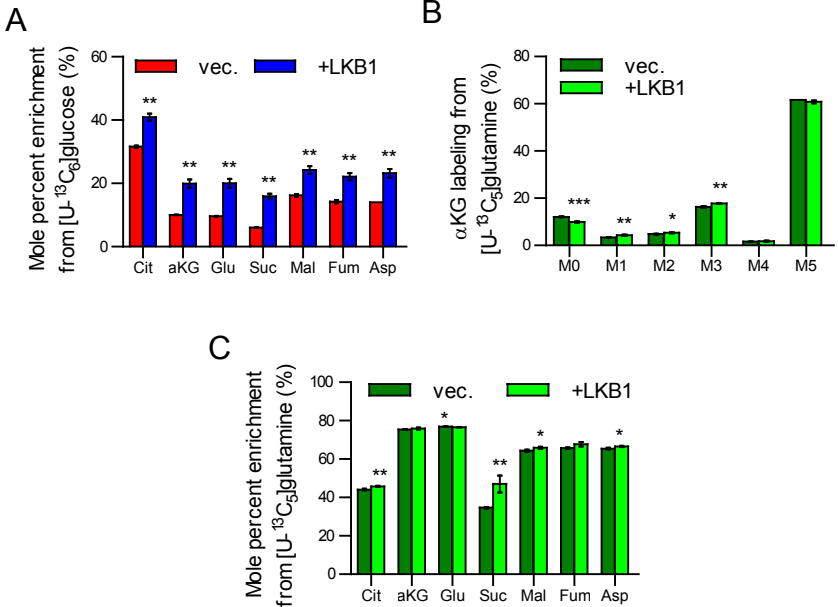

## Supplemental Figure 2

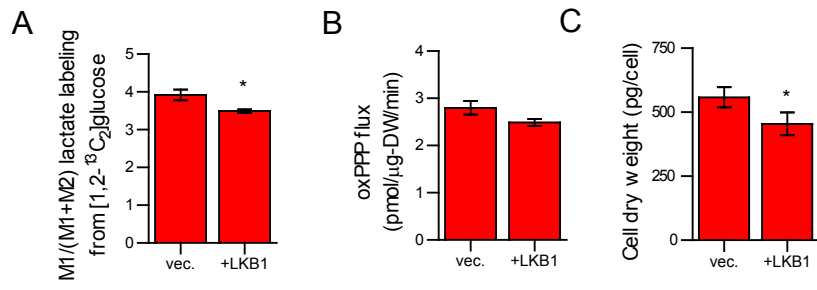

# Supplemental Figure 4

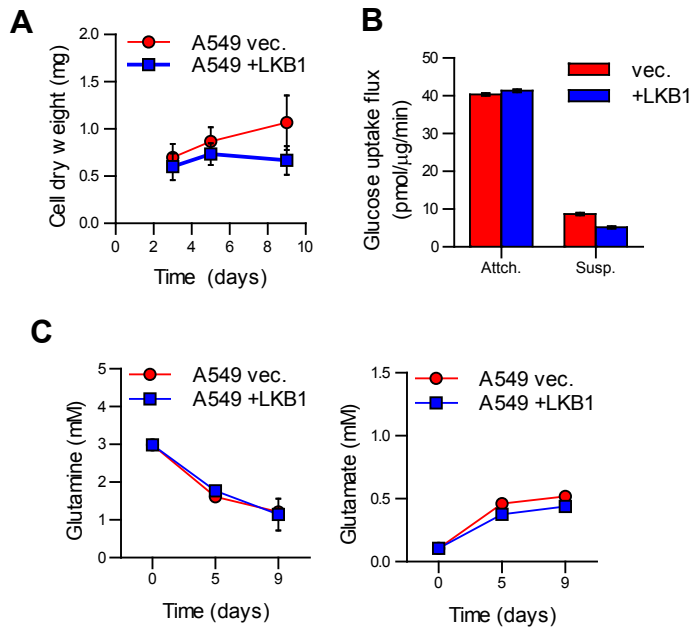

# Supplemental Figure 5

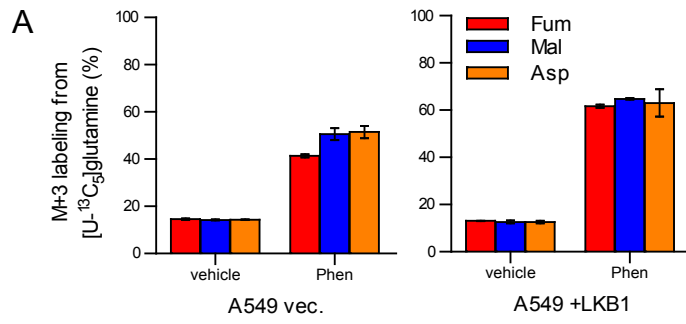

Supplement: NIHMS841001-supplement-1.pdf [file NIHMS841001-supplement-1.pdf]
